# Supplementary material
Source: Research Square preprint supplement (doi:10.21203/rs.3.rs-10049655/v1)
Supplement: Supplementary file 1 [file a5ac769b8ad39bf935883114.docx]

**Appendix 1**

**Interview Guide**

Part 1: General Perceptions of Online Sexual Exploitation of Children

1.1. Do you think online sexual exploitation of children — such as online grooming, sexting, distribution of explicit content, sexual extortion, or sharing of explicit videos — is prevalent in Hong Kong?

1.2. What factors do you think contribute to its prevalence?

1.3. To what extent do you think digital technology facilitates online sexual exploitation of children in Hong Kong?

Part 2: Responses to Hypothetical Scenarios

The interviewee will first read Hypothetical Scenario 1and discuss it with the interviewer. They will then read Hypothetical Scenario 2 and discuss it with the interviewer.

Hypothetical Scenario 1

2.1a. If you became aware, whether through students, colleagues, or parents, that a student at your school had encountered the situation described in the scenario, what would your thoughts and feelings be?

2.1b. If the incident were reported directly to you by the student, how would you handle it? What factors would you consider in deciding how to respond?

2.1c. If the incident were reported to you by a parent or another student, how would you handle it? What factors would you consider in deciding how to respond?

2.1d. Do you anticipate encountering any ethical dilemmas when handling this incident?

Hypothetical Scenario 2

2.2a. If you became aware, whether through students, colleagues, or parents, that a student at your school had encountered the situation described in the scenario, what would your thoughts and feelings be?

2.2b. If the incident were reported directly to you by the student, how would you handle it? What factors would you consider in deciding how to respond?

2.2c. If the incident were reported to you by a parent or another student, how would you handle it? What factors would you consider in deciding how to respond?

2.2d. Do you anticipate encountering any ethical dilemmas when handling this incident?

Part 3: Prevention, Mandatory Reporting, and Professional Preparedness

3.1. Do you think mandatory reporting is feasible? Why or why not?

3.2. What suggestions do you have for preventing or addressing online sexual exploitation among students?

3.3. What can you do in your current role to prevent or respond to online sexual exploitation among students? How can you better prepare yourself for this work?

3.4. What challenges do you anticipate in implementing the suggestions discussed above? Are there any opportunities or facilitating factors that may support their implementation?

3.5. Is there anything else you would like to share regarding the prevention or handling of online sexual exploitation among students?
